# Supplementary material for: Phylogenetic of the Orchid Genus Coelogyne Inferred from Morphological Characteristics and Internal Transcribed Spacer (ITS) Sequence Data
Source: Preprints.org preprint supplement (doi:10.20944/preprints202011.0589.v1), 2020-11-23
Supplement: Supplementary file 1 [file Appendix 1 iTs.docx]

**Appendix 1: Morphological Characters State**

1. Rhizome: 0 = absent / 1 = present
2. Rhizome, growth form: 0 = monopodial / 1 = sympodial
3. Pseudobulbs: 0 = close (less than 3 cm apart) / 1 = distant (more than 3 cm apart)
4. Pseudobulb: 0 = smooth / 1= ribbed
5. Pseudobulb, laterally flattened: 0 = no / 1 = yes
6. Pseudobulbs, number of leaves: 0 = one-leaved / 1 = two-leaved
7. Pseudobulbs shape, ovoid (conical): 0 = no / 1 = yes
8. Pseudobulbs shape, elliptical: 0 = no / 1 = yes
9. Pseudobulbs shape, spherical: 0 = no / 1 = yes
10. Pseudobulbs shape, fusiform (spindle shape): 0 = no / 1 = yes
11. Leaf sheath: 0 = absent / 1 = present
12. Leaf blade/ lamina: 0 = smooth / 1 = pleated
13. Leaf length: 0 = small to intermediate (less than 30 cm) / 1 = large (more than 30 cm)
14. Leaf width (at middle): 0 = narrow (less than 3 cm) / 1 = broad (more than 3 cm)
15. Leaf shape, elliptical: 0 = no / 1 = yes
16. Leaf shape, lanceolate: 0 = no / 1 = yes
17. Leaf shape, linear: 0 = no / 1 = yes
18. Leaf shape, ovate: 0 = no / 1 = yes
19. Leaf bases, acute: 0 = no / 1 = yes
20. Leaf bases, cuneate: 0 = no / 1 = yes
21. Leaf bases, obtuse: 0 = no / 1 = yes
22. Leaf apex, acute: 0 = no / 1 = yes
23. Leaf apex, obtuse: 0 = no / 1 = yes
24. Leafmargin: 0 = entire / 1 =crisped
25. Inflorescence, pendulous: 0 = no / 1 = yes
26. Inflorescence insertion, synanthous: 0 = no / 1 = yes
27. Inflorescence insertion, hysteranthous: 0 = no / 1 = yes
28. Inflorescence insertion, heteranthous: 0 = no / 1 = yes
29. Inflorescence insertion, proteranthous: 0 = no / 1 = yes
30. Scape: 0 = without persistent bracts / 1 = with persistent bracts
31. Scape, shape in cross section: 0 = not flattened / 1 = flattened
32. Flower: 0 = single / 1 = multi-flowered
33. Flower: 0 = open in succession / 1 = all opening at the same time (simultaneously)
34. Flower, bract: 0 = caducous (deciduous) / 1 = persistent
35. Flower size, small (diameter less than 35 mm): 0 = no / 1 = yes
36. Flower size, medium (diameter 35-50 mm): 0 = no / 1 = yes
37. Flower size, large (diameter more than 50 mm): 0 = no / 1 = yes
38. Flower, fragrant: 0 = no / 1 = yes
39. Petal andsepal colour, white: 0 = no / 1 = yes
40. Petal and sepal colour, yellow: 0 = no / 1 = yes
41. Petal and sepal colour, green: 0 = no / 1 = yes
42. Petal and sepal colour, salmon pink: 0 = no / 1 = yes
43. Petal, length: 0 = up to 25 mm / 1 = more than 25 mm
44. Petal, width (at middle): 0 = up to 5 mm / 1 = more than 5 mm
45. Petal shape, elliptical: 0 = no / 1 = yes
46. Petal shape, lanceolate: 0 = no / 1 = yes
47. Petal shape, ovate-oblong: 0 = no / 1 = yes
48. Petal shape, linear: 0 = no / 1 = yes
49. Sepal length: 0 = up to 25 mm / 1 = more than 25 mm
50. Sepal width (at middle): 0 = up to 5 mm / 1 = more than 5 mm
51. Sepal shape, elliptical: 0 = no / 1 = yes
52. Sepal shape, lanceolate: 0 = no / 1 = yes
53. Sepal shape, ovate-oblong: 0 = no / 1 = yes
54. Sepal shape, falcate: 0 = no / 1 = yes
55. 55.Lip, length: 0 = short (up to 35 mm) / 1 = long (more than 35 mm)
56. Lip, margin, hairy: 0 = no / 1 = yes
57. Lip, colouration, green: 0 = no / 1 = yes
58. Lip, colouration, salmon pink: 0 = no / 1 = yes
59. Lip, colouration, white: 0 = no / 1 = yes
60. Lip, colouration, yellow: 0 = no / 1 = yes
61. Lip, colouration, brown: 0 = no / 1 = yes
62. Lip, colouration, black: 0 = no / 1 = yes
63. Lip, number of keels: 0 = one to three / 1 = more than three
64. Keels, all emerged from base: 0 = no / 1 = yes
65. Keels, smooth: 0 = no / 1 = yes
66. Keels, wavy: 0 = no / 1 = yes
67. Keels, papillose: 0 = no / 1 = yes
68. Keels, toothed: 0 = no / 1 = yes
69. Keels, warty: 0 = no / 1 = yes
