# Supplementary material for: Phylogenetic of the Orchid Genus Coelogyne Inferred from Morphological Characteristics and Internal Transcribed Spacer (ITS) Sequence Data
Source: Preprints.org preprint supplement (doi:10.20944/preprints202011.0589.v1), 2020-11-23
Supplement: Supplementary file 3 [file Table 1 iTS.docx]

Table 1: List of species studied and the gene bank accession number.

| No | Species | Location | Section | Voucher | Gene bank accession number | Collector name | Date of collection |
| --- | --- | --- | --- | --- | --- | --- | --- |
| 1. 1 | *C. fimbriata* | Gunung Tahan, Malaysia | *Fuliginosae* | RG 4461 | MK356158 | Yoh Kok Hon & Rusea Go (UPM) | 3 Sept. 2013 |
| 1. 2 | *C. fimbriata* | Gunung Jerai, Malaysia | *Fuliginosae* | L006 | MK356159 | Yoh Kok Hon & Rusea Go (UPM) | 15 Feb. 2013 |
| 1. 3 | *C. fimbriata* | Kedah, Malaysia | *Fuliginosae* | YKH 022 | MK356160 | Yoh Kok Hon & Rusea Go (UPM) | 15 Feb. 2013 |
| 1. 4 | *C. fimbriata* | Terengganu, Malaysia | *Fuliginosae* | FRI 71463 | MK356161 | Ong Poh Teck (FRIM) | 26 Apr. 2011 |
| 1. 5 | *C. asperata* | Kedah, Malaysia | *Verrucosae* | YKH 025 | MK356162 | Yoh Kok Hon & Rusea Go (UPM) | 15 Feb. 2013 |
| 1. 6 | *C. asperata* | Perak, Malaysia | *Verrucosae* | L012 | MK356163 | Yoh Kok Hon & Rusea Go (UPM) | 28 Sept. 2012 |
| 1. 7 | *C. asperata* | Terengganu, Malaysia | *Verrucosae* | L013 | MK356164 | Yoh Kok Hon & Rusea Go (UPM) | 9 Aug. 2012 |
| 1. 8 | *C. asperata* | Selangor, Malaysia | *Verrucosae* | L014 | MK356165 | Yoh Kok Hon & Rusea Go (UPM) | 19 Jan. 2012 |
| 1. 9 | *C. mayeriana* | Cameron Highlands, Malaysia | *Verrucosae* | YKH 011 | MK356195 | Yoh Kok Hon & Rusea Go (UPM) | 10 Jan. 2012 |
| 1. 10 | *C. mayeriana* | Selangor, Malaysia | *Verrucosae* | UMC 1415 | MK356196 | Planted in Universiti Malaya | 18 Jul. 2013 |
| 1. 11 | *C. pandurata* | Genting Highlands, Malaysia | *Verrucosae* | L009 | MK356176 | Yoh Kok Hon & Rusea Go (UPM) | 14 Feb. 2012 |
| 1. 12 | *C. pandurata* | Cameron Highlands, Malaysia | *Verrucosae* | YKH 010 | MK356177 | Yoh Kok Hon & Rusea Go (UPM) | 10 Jan. 2012 |
| 1. 13 | *C. pandurata* | Terengganu, Malaysia | *Verrucosae* | L011 | MK356178 | Yoh Kok Hon & Rusea Go (UPM) | 9 Aug.t 2012 |
| 1. 14 | *C. pandurata* | Selangor, Malaysia | *Verrucosae* | UMC 1394 | MK356179 | Planted in Universiti Malaya | 18 Jul. 2013 |
| 1. 15 | 1. *cumingii* | Gunung Jerai, Malaysia | *Coelogynae* | RG 4389 | MK356170 | Yoh Kok Hon & Rusea Go (UPM) | 15 Feb. 2013 |
| 1. 16 | 1. *cumingii* | Kelantan, Malaysia | *Coelogynae* | YKH 012 | MK356171 | Yoh Kok Hon & Rusea Go (UPM) | 14 Feb. 2012 |
| 1. 17 | 1. *cumingii* | Kedah, Malaysia | *Coelogynae* | YKH 026 | MK356172 | Yoh Kok Hon & Rusea Go (UPM) | 15 Feb. 2013 |
| 1. 18 | *C. foerstermannii* | Gunung Arong, Malaysia | *Coelogynae* | RG 3993 | MK356204 | Yoh Kok Hon & Rusea Go (UPM) | 8 Apr. 2013 |
| 1. 19 | *C. foerstermannii* | Gunung Jerai, Malaysia | *Coelogynae* | L005 | MK356205 | Yoh Kok Hon & Rusea Go (UPM) | 15 Feb. 2013 |
| 1. 20 | *C. foerstermannii* | Setiu, Malaysia | *Coelogynae* | YKH 028 | MK356206 | Yoh Kok Hon & Rusea Go (UPM) | 9 Aug. 2012 |
| 1. 21 | *C. rochussenii* | Taiping's Hill, Malaysia | *Tomentosae* | L007 | MK356173 | Rusea Go (UPM) | 28 Sept. 2012 |
| 1. 22 | *C. rochussenii* | Gunung Jerai, Malaysia | *Tomentosae* | L008 | MK356174 | Yoh Kok Hon & Rusea Go (UPM) | 15 Feb. 2013 |
| 1. 23 | *C. rochussenii* | Fraser's Hill, Malaysia | *Tomentosae* | UMC 673 | MK356175 | Planted in Universiti Malaya | 18 Jul. 2013 |
| 1. 24 | *C. pulverula* | Cameron Highlands, Malaysia | *Tomentosae* | YKH 009 | MK356155 | Yoh Kok Hon & Rusea Go (UPM) | 10 Jan. 2012 |
| 1. 25 | *C. pulverula* | Fraser's Hill, Malaysia | *Tomentosae* | L002 | MK356156 | Farah Alia & Rusea Go (UPM) | 1 July 2011 |
| 1. 26 | *C. pulverula* | Genting Highlands, Malaysia | *Tomentosae* | L015 | MK356157 | Yoh Kok Hon & Rusea Go (UPM) | 14 Feb. 2012 |
| 1. 27 | *C. testacea* | Kedah, Malaysia | *Tomentosae* | YKH 023 | MK356202 | Yoh Kok Hon & Rusea Go (UPM) | 15 Feb. 2013 |
| 1. 28 | *C. testacea* | Terengganu, Malaysia | *Tomentosae* | KGB 20081942 | MK356203 | Ong Poh Teck (FRIM) | 1 Sept. 2010 |
| 1. 29 | *C. swaniana* | Perak, Malaysia | *Tomentosae* | L001 | MK356207 | Yoh Kok Hon & Rusea Go (UPM) | 28 Sept. 2012 |
| 1. 30 | *C. swaniana* | Gunung Jerai, Malaysia | *Tomentosae* | L002 | MK356208 | Yoh Kok Hon & Rusea Go (UPM) | 15 Feb. 2013 |
| 1. 31 | *C. tomentosa* | Genting Highlands, Malaysia | *Tomentosae* | YKH 018 | MK356187 | Yoh Kok Hon & Rusea Go (UPM) | 14 Feb. 2012 |
| 1. 32 | *C. tomentosa* | Cameron Highlands, Malaysia | *Tomentosae* | L010 | MK356188 | Yoh Kok Hon & Rusea Go (UPM) | 10 Jan. 2012 |
| 1. 33 | *C. tomentosa* | Fraser's Hill, Malaysia | *Tomentosae* | FAN.FH293 | MK356189 | Farah Alia & Rusea Go (UPM) | 1 Jul. 2011 |
| 1. 34 | *C. tomentosa* | Endau-Rompin, Malaysia | *Tomentosae* | RG 2809 | MK356190 | Yoh Kok Hon & Rusea Go (UPM) | 1 Jul. 2012 |
| 1. 35 | *C. kaliana* | Genting Highlands, Malaysia | *Tomentosae* | YKH 020 | MK356193 | Yoh Kok Hon & Rusea Go (UPM) | 14 Feb. 2012 |
| 1. 36 | *C. kaliana* | Cameron Highlands, Malaysia | *Tomentosae* | YKH 004 | MK356194 | Yoh Kok Hon & Rusea Go (UPM) | 10 Jan. 2012 |
| 1. 37 | *C. prasina* | Genting Highlands, Malaysia | *Longifoliae* | YKH 014, YKH 015, YKH 016 | MK356180 | Yoh Kok Hon & Rusea Go (UPM) | 14 Feb. 2012 |
| 1. 38 | *C. prasina* | Cameron Highlands, Malaysia | *Longifoliae* | YKH 003 | MK356181 | Yoh Kok Hon & Rusea Go (UPM) | 10 Jan. 2012 |
| 1. 39 | *C. prasina* | Gunung Tahan, Malaysia | *Longifoliae* | YKH 032 | MK356182 | Yoh Kok Hon & Rusea Go (UPM) | 3 Sept. 2013 |
| 1. 40 | *C. prasina* | Endau-Rompin, Malaysia | *Longifoliae* | RG 2807 | MK356183 | Yoh Kok Hon & Rusea Go (UPM) | 1 Jul. 2012 |
| 1. 41 | *C. prasina* | Fraser's Hill, Malaysia | *Longifoliae* | FAN.FH115 | MK356184 | Farah Alia & Rusea Go (UPM) | 1 Jul. 2011 |
| 1. 42 | *C. prasina* | Pulau Banding, Malaysia | *Longifoliae* | RG 2884 | MK356185 | Rusea Go (UPM) | 5 Oct. 2012 |
| 1. 43 | *C. prasina* | Gunung Jerai, Malaysia | *Longifoliae* | RG 4390 | MK356186 | Yoh Kok Hon & Rusea Go (UPM) | 15 Feb. 2013 |
| 1. 44 | *C. radicosa* | Genting Highlands, Malaysia | *Longifoliae* | YKH 013 | MK356166 | Yoh Kok Hon & Rusea Go (UPM) | 14 Feb. 2012 |
| 1. 45 | *C. radicosa* | Cameron Highlands, Malaysia | *Longifoliae* | YKH 002 | MK356167 | Yoh Kok Hon & Rusea Go (UPM) | 10 Jan. 2012 |
| 1. 46 | *C. radicosa* | Fraser's Hill, Malaysia | *Longifoliae* | FAN.FH193 | MK356168 | Farah Alia & Rusea Go (UPM) | 1 Jul. 2011 |
| 1. 47 | *C. radicosa* | Gunung Tahan, Malaysia | *Longifoliae* | RG 4488 | MK356169 | Yoh Kok Hon & Rusea Go (UPM) | 3 Sept. 2013 |
| 1. 48 | *C. stenochila* | Gunung Tahan, Malaysia | *Longifoliae* | YKH 031 | MK356153 | Yoh Kok Hon & Rusea Go (UPM) | 3 Sept. 2013 |
| 1. 49 | *C. septemcostata* | Endau-Rompin, Malaysia | *Speciosae* | RG 2787, RG2801 | MK356191 | Yoh Kok Hon & Rusea Go (UPM) | 1 Jul. 2012 |
| 1. 50 | *C. septemcostata* | Terengganu, Malaysia | *Speciosae* | FRI 71373 | MK356192 | Ong Poh Teck (FRIM) | 1 Sept. 2010 |
| 1. 51 | *C. xyrekes* | Genting Highlands, Malaysia | *Speciosae* | YKH 029 | MK356197 | Yoh Kok Hon & Rusea Go (UPM) | 14 Feb. 2012 |
| 1. 52 | *C. xyrekes* | Cameron Highlands, Malaysia | *Speciosae* | YKH 006, YKH 007 | MK356198 | Yoh Kok Hon & Rusea Go (UPM) | 10 Jan. 2012 |
| 1. 53 | *C. tiomanensis* | Gunung Kajang, Malaysia | *Speciosae* | FRI 75329 | MK356154 | Ong Poh Teck (FRIM) | 8 Aug. 2013 |
| 1. 54 | *C. trinervis* | Kelantan, Malaysia | *Flaccidae* | L004 | MK356199 | Rusea Go (UPM) | 30 Oct. 2013 |
| 1. 55 | *C. trinervis* | Kedah, Malaysia | *Flaccidae* | YKH 024 | MK356200 | Yoh Kok Hon & Rusea Go (UPM) | 15 Feb. 2013 |
| 1. 56 | *C. trinervis* | Terengganu, Malaysia | *Flaccidae* | L003 | MK356201 | Yoh Kok Hon & Rusea Go (UPM) | 9 Aug. 2012 |
| 1. 57 | *C. viscosa* | Cameron Highlands, Malaysia | *Flaccidae* | YKH 001 | MK356152 | Yoh Kok Hon & Rusea Go (UPM) | 10 Jan. 2012 |
| 1. 58 | *C.* sp 1 | Setiu, Malaysia | ? | RG 2827 | - | Yoh Kok Hon & Rusea Go (UPM) | 9 Aug. 2012 |
| 1. 59 | *C.* sp 2 | Setiu, Malaysia | ? | RG 2828 | - | Yoh Kok Hon & Rusea Go (UPM) | 9 Aug. 2012 |
