# Supplementary material for: Phylogenetic of the Orchid Genus Coelogyne Inferred from Morphological Characteristics and Internal Transcribed Spacer (ITS) Sequence Data
Source: Preprints.org preprint supplement (doi:10.20944/preprints202011.0589.v1), 2020-11-23
Supplement: Supplementary file 4 [file Table 2 iTs.docx]

**Table 2: Reaction mixture for PCR**

| **Chemical**  **Stock Concentration** | **Final Concentration** | **Final Volume (μl)** |
| --- | --- | --- |
| Buffer (5X) | 1 X | 10.00 |
| MgCl2 (25 mM) | 2.5 mM | 5.00 |
| dNTPs mix (10 mM) | 0.05 mM | 2.00 |
| Forward Primer (100 μM) | 0.5 μM | 1.00 |
| Reverse Primer (100 μM) | 0.5 μM | 1.00 |
| DNA Polymerase (5U/ul) | 0.5 unit | 0.50 |
| DNA template | 10 to 500 ng | 1.00 |
| ddH2O | up to final volume of 50 μl | 29.50 |
|  | Total | 50.00 μl |
